# Supplementary material for: Role of Arg1+ ILC2s and ILCregs in gestational diabetes progression
Source: PubMed Central journal article supplement — Sci Rep. 2025 Jan 10;15:1580. doi: 10.1038/s41598-025-85452-x (PMC11724119; doi:10.1038/s41598-025-85452-x), 2025-01-10
Supplement: 41598_2025_85452_MOESM1_ESM.pdf [file 41598_2025_85452_MOESM1_ESM.pdf]

# Role of Arg1<sup>+</sup> ILC2s and ILCregs in Gestational Diabetes Progression

Zhangyun Gong<sup>1,2\*</sup>; Haixing Yi<sup>1,2\*</sup>; Jie Zhang<sup>1,2\*</sup>; Wan Li<sup>1,2</sup>; Hao Wang<sup>1,2</sup>; Peipei Guo<sup>1,2</sup>;  
Caihua Li<sup>1,2</sup>; Anan Pan<sup>1,2</sup>; Yunxia Cao<sup>1,2</sup>; Zhimin Lu<sup>1,2#</sup>; Huanhuan Jiang<sup>1,2#</sup>

<sup>1</sup>Reproductive Medicine Center, Department of Obstetrics and Gynecology, the First Affiliated Hospital of Anhui Medical University, Wanshui Road No.120, Hefei, 230000, Anhui, China

<sup>2</sup>NHC Key Laboratory of study on abnormal gametes and reproductive tract (Anhui Medical University), No 81 Meishan Road, Hefei, 230032, Anhui, China

\*These authors contribute equally to this work.

#Corresponding author: Zhimin Lu, PhD, E-mail: luzhimin412@163.com

Huanhuan Jiang, PhD, E-mail: jhh198673@163.com

None of the authors have a conflict of interest.

### Supplementary Figure 1

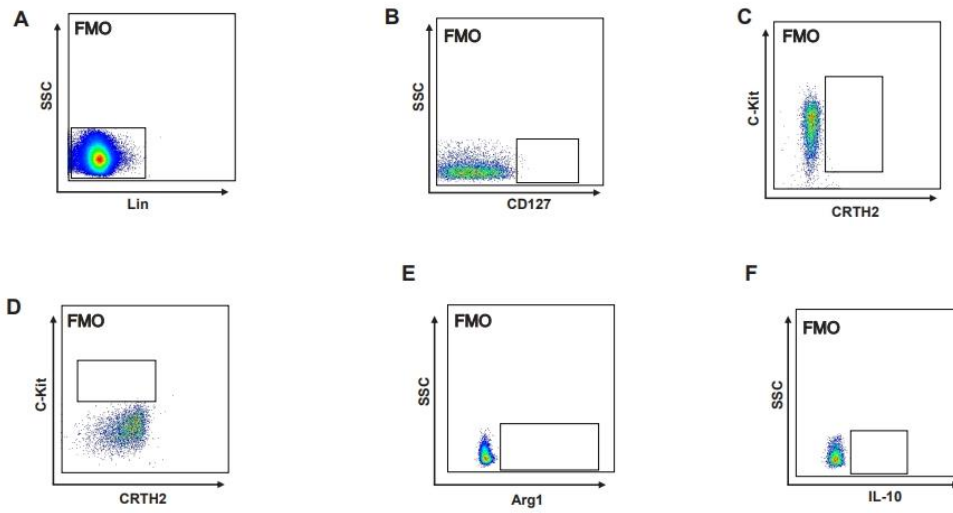

Supplemental figure 1. FMO Controls for the Identification of ILCs and ILCregs subsets in PBMCs. (A-F) Representative flow cytometry plots showing FMO controls for each fluorophore in the panel.

### Supplementary Figure 2

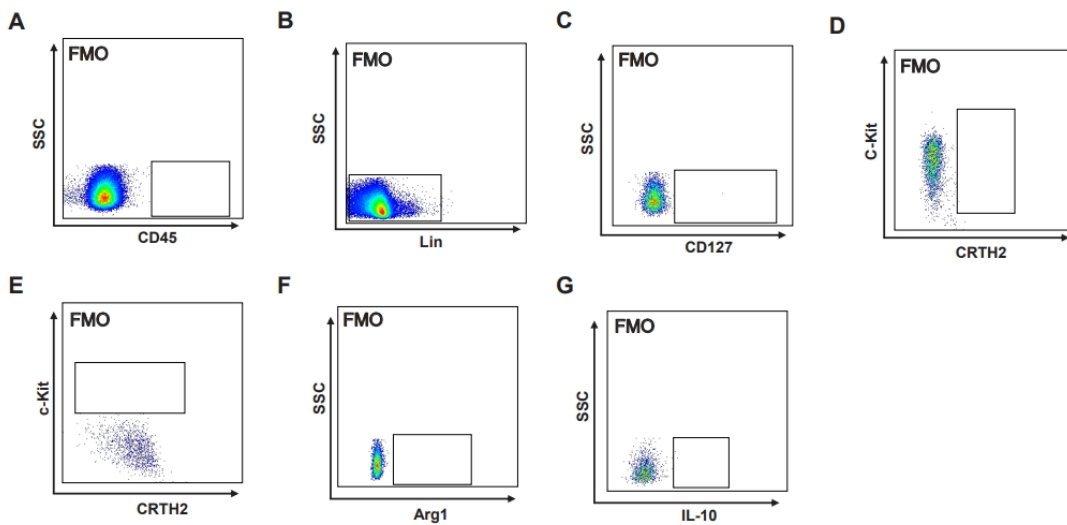

Supplemental figure 2. FMO Controls for the Identification of ILCs and ILCregs subsets in tissue. (A-G) Representative flow cytometry plots showing FMO controls for each fluorophore in the panel.
